# Supplementary material for: Kinetics of Rhodopsin Deactivation and Its Role in Regulating Recovery and Reproducibility of Rod Photoresponse
Source: PLOS journal article supplement (doi:10.1371/journal.pcbi.1001031), 2010-12-16
Supplement: S2 (10.1371/journal.pcbi.1001031.s002) [file journal.pcbi.1001031.s002]

SPR for Transgenic Mouse for  $\tau_{R,\text{eff}} = 40 \text{ ms}$  and  $\nu_{\text{RG}} = 575\text{s}^{-1}$

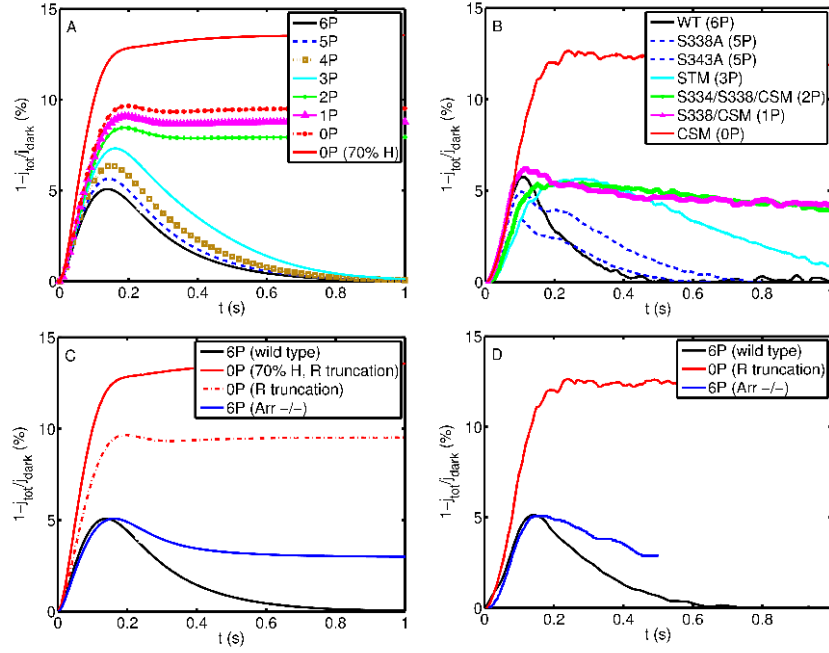

**Figure S2. Simulations SPR for mutant phosphorylation sites of  $R^*$ , or with Arr knockout.** **Panel A:** Simulated SPRs for rhodopsin with a number  $n = 0, 1, \dots, 6$  of available phosphorylation sites (thus  $(6 - n)$  sites are mutant); **Panel B:** Reproduction of data from [36] showing SPRs from mutant mice with different phosphorylation sites. CSM: completely substituted mutant (0P); STM: serine triple mutant (3P); S338A: mutant lacking S338 (5P); S343A: mutant lacking residue S343 (5P); S338/CSM: one site (S338) was restored in the CSM (1P); S334/S338/CSM: two sites (S334 and S338) were restored in the CSM (2P); Mutant rhodopsins bearing zero, one (S338), or two (S334/S338) phosphorylation sites generated single-photon responses with greatly prolonged durations. Responses from rods expressing mutant rhodopsins bearing more than two phosphorylation sites declined along smooth, reproducible time courses; the rate of recovery increased with increasing numbers of phosphorylation sites; **Panel C:** Simulated SPRs with no phosphorylation site (0P), lacking arrestin ( $-/-$ ), and wild type (WT); **Panel D:** Reproduction of the SPRs from rod with C terminal truncation, lacking arrestin ( $-/-$ ), and wild type ( $+/+$ ) [41]. With arrestin absent, the flash response displayed a rapid partial recovery followed by a prolonged final phase. This behavior indicates that an arrestin-independent mechanism initiates the quench of rhodopsin's catalytic activity and that arrestin completes the quench.
