# Supplementary material for: Kinetics of Rhodopsin Deactivation and Its Role in Regulating Recovery and Reproducibility of Rod Photoresponse
Source: PLOS journal article supplement (doi:10.1371/journal.pcbi.1001031), 2010-12-16
Supplement: S4 (10.1371/journal.pcbi.1001031.s004) [file journal.pcbi.1001031.s004]

301 Moved Permanently

# Moved Permanently

The document has moved here.

---

Apache Server at www.ploscompbiol.org Port 80
