# Supplementary material for: Kinetics of Rhodopsin Deactivation and Its Role in Regulating Recovery and Reproducibility of Rod Photoresponse
Source: PLOS journal article supplement (doi:10.1371/journal.pcbi.1001031), 2010-12-16
Supplement: S4 (10.1371/journal.pcbi.1001031.s004) [file journal.pcbi.1001031.s004]

**A Parameter Table for the WT SPR for the Dynamics  $\tau_{R;eff} \approx 75$  ms and  $\nu_{RG} \approx 330s^{-1}$  and the Faster Dynamics  $\tau_{R;eff} \approx 40$  ms and  $\nu_{RG} \approx 575s^{-1}$**

Table S2 collects the simulation parameters for the two indicated dynamics. The ones in black, equal to those of Table S2 reflect the slower dynamics  $\tau_{R;eff} \approx 75$  ms and  $\nu_{RG} \approx 330s^{-1}$  and those in **bold** are those that need to be modified to accomodate the faster dynamics  $\tau_{R;eff} \approx 40$  ms and  $\nu_{RG} \approx 575s^{-1}$ .

**Table S2.** Model parameters in mouse phototransduction.

BLACK:  $\tau_{R^*} = 75$  ms

**Bold:**  $\tau_{R^*} = 41$  ms

| Symbol                      | Units               | Definition                                                             | Value                | References          |
|-----------------------------|---------------------|------------------------------------------------------------------------|----------------------|---------------------|
| $\alpha_{max}$              | $\mu Ms^{-1}$       | Maximum rate of cGMP synthesis at low $Ca^{2+}$ concentration          | 76.5                 | [1, 2]              |
| $\alpha_{max}/\alpha_{min}$ | -                   | Suppression ratio of $\alpha$ from high to low $Ca^{2+}$ concentration | 13.9                 | [1–3]               |
| $A_{inc}$                   | $\mu m^2$           | Area of the incisure                                                   | 0.0403               |                     |
| $\beta_{dark}$              | $s^{-1}$            | Rate of cGMP hydrolysis by dark activated PDE                          | 2.9                  | [2, 4, 5]           |
| $B_{cG}$                    | -                   | Buffering power of cytoplasm for cGMP                                  | 1                    | [6–8]               |
| $B_{Ca}$                    | -                   | Buffering power of cytoplasm for $Ca^{2+}$                             | 20                   | [6, 9, 10]          |
| $c_{GE}$                    | -                   | Coupling coefficient from $G^*$ to $E^*$                               | 1                    | [8, 11]             |
| $[cGMP]_{dark}$             | $\mu M$             | Concentration of cGMP in the dark                                      | 3.80 <b>(3.37)</b>   | [2, 3, 6–8, 12–14]  |
| $[Ca^{2+}]_{dark}$          | $nM$                | Concentration of $Ca^{2+}$ in the dark                                 | 344 <b>(394)</b>     | [4, 8, 15–22]       |
| $D_{cG}$                    | $\mu m^2 s^{-1}$    | Diffusion coefficient for cGMP                                         | 120                  | [23–25]             |
| $D_{Ca}$                    | $\mu m^2 s^{-1}$    | Diffusion coefficient for $Ca^{2+}$                                    | 15                   | [9]                 |
| $D_{E^*}$                   | $\mu m^2 s^{-1}$    | Diffusion coefficient for activated PDE                                | 1.2                  | [7]                 |
| $D_{G^*}$                   | $\mu m^2 s^{-1}$    | Diffusion coefficient for activated G protein                          | 2.2                  | [7]                 |
| $D_{R^*}$                   | $\mu m^2 s^{-1}$    | Diffusion coefficient for activated Rh                                 | 1.5                  | [7]                 |
| $\varepsilon$               | $nm$                | Disk thickness                                                         | 14.5                 | [7, 26, 27]         |
| $\eta$                      | $nm$                | Volume-to-surface ratio                                                | 7.25                 |                     |
| $\mathcal{F}$               | $C mol^{-1}$        | Faraday’s constant                                                     | 96500                |                     |
| $f_{Ca}$                    | -                   | Fraction of cGMP-activated current carried by $Ca^{2+}$                | 0.06                 | [1, 5, 8, 28, 29]   |
| $H$                         | $\mu m$             | Height of ROS                                                          | 23.6                 | [8, 26, 30, 31]     |
| $j_{dark}$                  | $pA$                | Dark current                                                           | 10.9 <b>(12.21)</b>  | [1, 3, 4, 8, 32–41] |
| $j_{cG}^{max}$              | $pA$                | Maximum cGMP-gated channel current                                     | 3550                 |                     |
| $j_{ex}^{sat}$              | $pA$                | Saturated exchanger current                                            | 1.8                  | [42–44]             |
| $k_{cat}/K_m$               | $\mu M^{-1} s^{-1}$ | Hydrolytic efficiency of activated PDE dimer                           | 540                  | [7, 11, 45]         |
| $k_{\sigma;hyd}$            | $\mu m^3 s^{-1}$    | Surface hydrolysis rate of cGMP by dark-activated PDE                  | $2.8 \times 10^{-5}$ |                     |
| $k_{\sigma;hyd}^*$          | $\mu m^3 s^{-1}$    | Surface hydrolysis rate of cGMP by light-activated PDE                 | 0.9                  |                     |

Continued on next page

Table S2 – continued from previous page

| Symbol              | Units            | Definition                                                                                      | Value                 | References                     |
|---------------------|------------------|-------------------------------------------------------------------------------------------------|-----------------------|--------------------------------|
| $k_E$               | $s^{-1}$         | Rate constant for inactivation of PDE                                                           | 6.5                   | [4, 5, 46, 47]                 |
| $k_R$               | $s^{-1}$         | Rate constant for inactivation of Rh                                                            | 13.3 ( <b>24.39</b> ) | [4, 10, 47]                    |
| $k_{T^*E}$          | $\mu m^2 s^{-1}$ | Kinetic constant describing the formation of $T^* - E$ complex and thus the production of $E^*$ | 1                     | [48]                           |
| $K_{cyc}$           | $nM$             | Half-saturating $[Ca^{2+}]$ for GC activity                                                     | 100                   | [1, 2, 4, 5]                   |
| $K_{cG}$            | $\mu M$          | $[cGMP]$ for half maximum cGMP-gated channel opening                                            | 20                    | [8]                            |
| $K_{ex}$            | $\mu M$          | $[Ca^{2+}]$ for half maximum exchanger channel opening                                          | 1.6                   | [8, 43]                        |
| $l_b$               | $\mu m$          | Width of the incisure                                                                           | 0.2593                | [49]                           |
| $l_r$               | $\mu m$          | Length of the incisure                                                                          | 0.3111                | [49]                           |
| $\nu$               | -                | Ratio between interdiscal space and disk thickness                                              | 1                     | [7, 8, 11, 26]                 |
| $\nu\varepsilon$    | $nm$             | Interdiscal space                                                                               | 14.5                  | [7, 26, 30, 31]                |
| $\nu_{RG}$          | $s^{-1}$         | Rate of transducin formation per fully activated Rh                                             | 330 ( <b>575</b> )    | [6, 8, 11, 50]                 |
| $n$                 | #                | Number of disks                                                                                 | 814                   |                                |
| $n_{inc}$           | #                | Number of incisures                                                                             | 1                     | [7, 26, 49]                    |
| $N_{Av}$            | $\#mol^{-1}$     | Avogadro number                                                                                 | $6.02 \times 10^{23}$ |                                |
| $m_{cyc}$           | -                | Hill coefficient for GC effect                                                                  | 2                     | [1–5]                          |
| $m_{cG}$            | -                | Hill coefficient for cGMP-gated channel                                                         | 3.5 ( <b>3.2</b> )    | [2–4, 7, 38]                   |
| $[PDE]_\sigma$      | $\#\mu m^{-2}$   | Surface density of dark-activated PDE                                                           | 750                   | [7, 8, 27, 30, 51]             |
| $R$                 | $\mu m$          | Radius of disk                                                                                  | 0.7                   | [7, 8, 26, 27, 30, 31, 52, 53] |
| $\sigma$            | -                | Ratio between outer shell thickness and disk thickness                                          | 15/14.5               |                                |
| $\sigma\varepsilon$ | $nm$             | Distance between the disk rim and the plasma membrane (outer shell thickness)                   | 15                    | [7, 24]                        |
| $\Sigma_{rod}$      | $\mu m^2$        | Lateral surface area of ROS                                                                     | 103.8                 |                                |
| $V_{cyt}$           | $\mu m^3$        | Cytoplasmic volume                                                                              | 18.16                 |                                |
